# Supplementary material for: 一筆入魂 深い闇を掘り返す意味はあるのか : 雄勝病院の悲劇を取材して
Source: Royal Society of Chemistry journal article supplement (doi:10.1039/c7cp00850c), 2012-11-15
Supplement: c7cp00850c1.pdf [file c7cp00850c1.pdf]

# SUPPORTING INFO

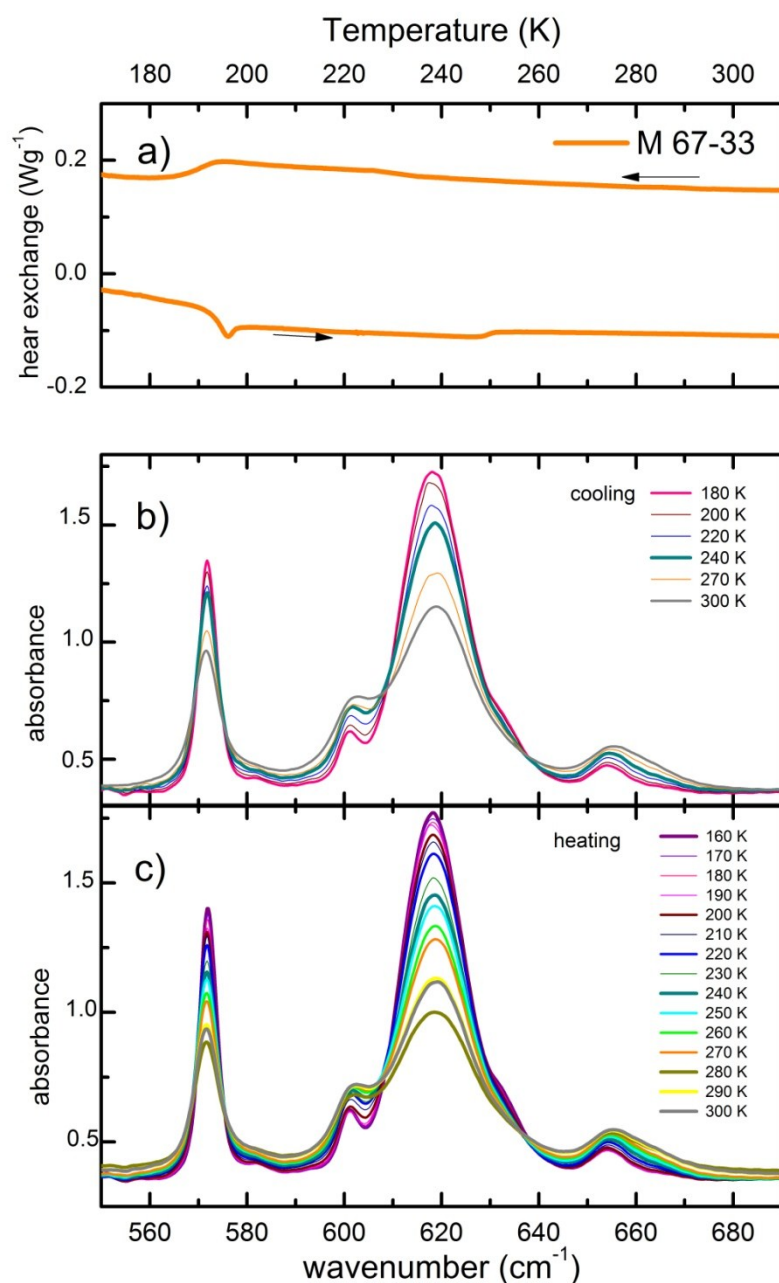

Figure 1S. Temperature dependence of the absorbance of sample M 67-33 measured on cooling (panel b) and subsequent heating (panel c) at 5 K/min. For reference, also the DSC trace measured at the same temperature rate for the sample M 67-33 is showed (panel a).

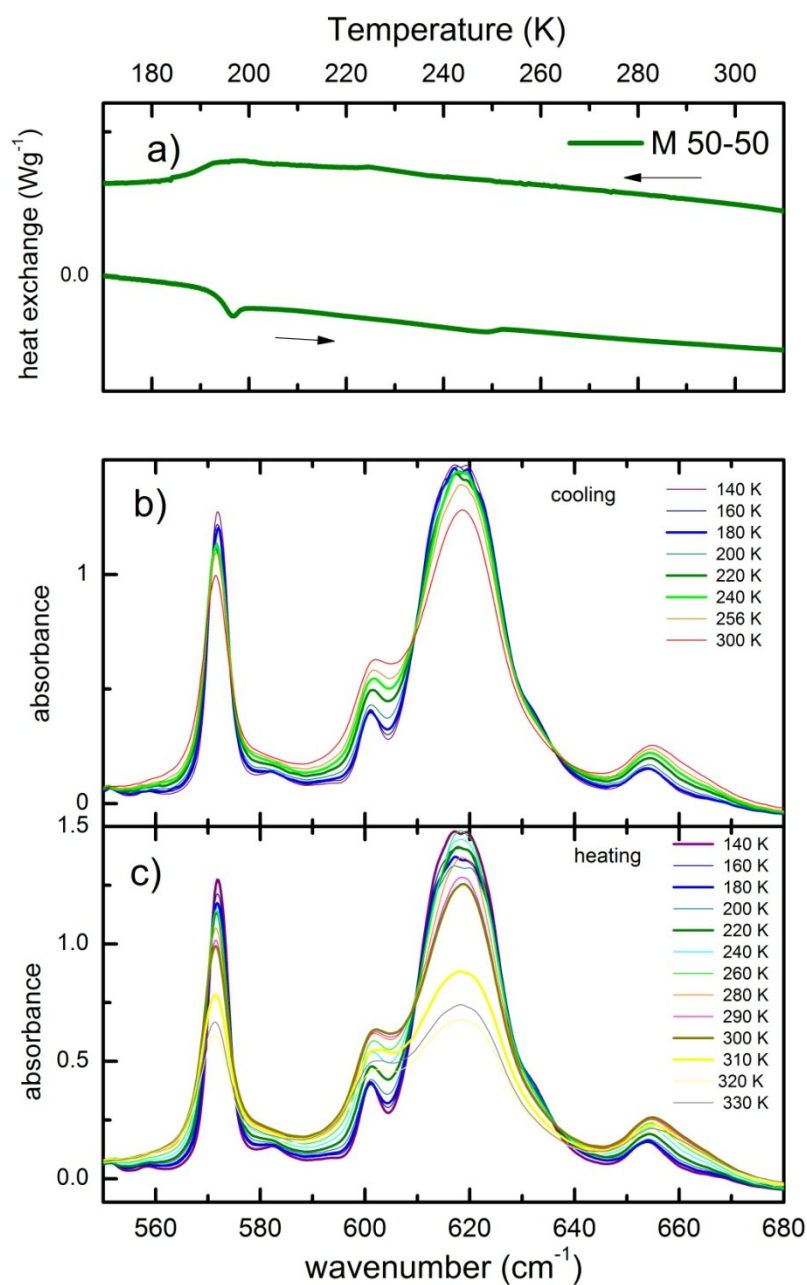

Figure 2S. Temperature dependence of the absorbance of sample M 50-50 measured on cooling (panel b) and subsequent heating (panel c) at 5 K/min. For reference, also the DSC trace measured at the same temperature rate for the sample M 50-50 is showed (panel a).

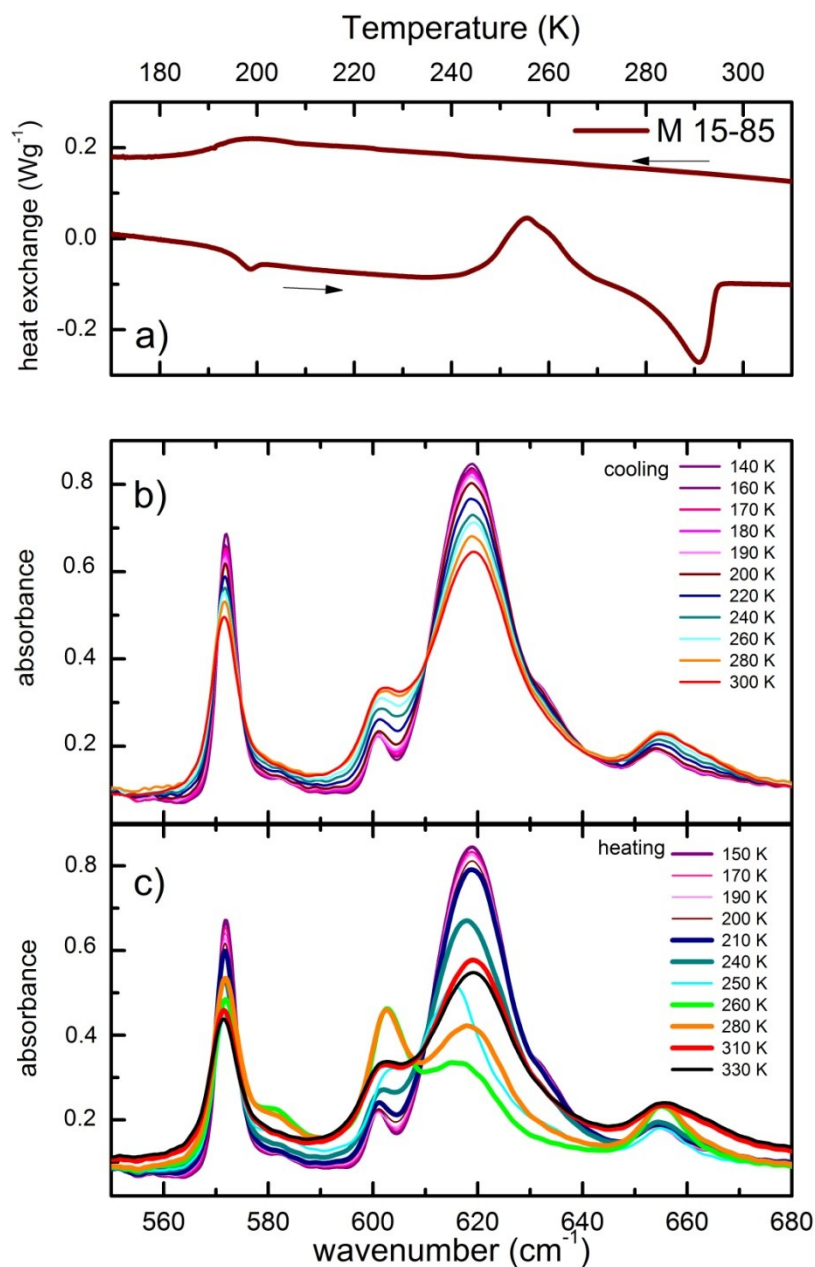

Figure 3S. Temperature dependence of the absorbance of sample M 15-85 measured on cooling (panel b) and subsequent heating (panel c) at 5 K/min. For reference, also the DSC trace measured at the same temperature rate for the sample M 15-85 is showed (panel a).
